# Supplementary material for: Association of a novel dystrophin (DMD) genetic nonsense variant in a cat with X‐linked muscular dystrophy with a mild clinical course
Source: PubMed Central journal article supplement — J Vet Intern Med. 2024 Feb 28;38(2):1160–6. doi: 10.1111/jvim.17024 (PMC10937502; doi:10.1111/jvim.17024), 2024-02-28
Supplement: JVIM-38-1160-s001.pdf [file JVIM-38-1160-s001.pdf]

**Table S1. The numbers of variants identified in 414 cats of the 99 Lives Cat Genome Sequencing Consortium dataset, including 362 cats' whole genome sequencing and 52 cats' whole exome sequencing data, and unique variants identified in this case**

| Variant                           | 414 cats' variants* | Case – unique variants <sup>†</sup> |              |
|-----------------------------------|---------------------|-------------------------------------|--------------|
|                                   |                     | Hemi-/homozygous                    | Heterozygous |
| 3' UTR                            | 779,313             | 9                                   | 158          |
| 5' UTR premature start codon gain | 14,709              | 0                                   | 1            |
| 5' UTR                            | 253,248             | 8                                   | 47           |
| Disruptive inframe deletion       | 3,232               | 0                                   | 0            |
| Disruptive inframe insertion      | 7,348               | 0                                   | 0            |
| Downstream gene                   | 11,812              | 0                                   | 0            |
| Frameshift                        | 122,878             | 3                                   | 22           |
| Inframe deletion                  | 12,416              | 2                                   | 5            |
| Inframe insertion                 | 17,437              | 0                                   | 2            |
| Initiator codon                   | 1,320               | 0                                   | 0            |
| Intergenic                        | 24                  | 0                                   | 0            |
| Intron                            | 312,834             | 0                                   | 0            |
| Missense                          | 404,240             | 15                                  | 244          |
| Non-coding exon                   | 363,539             | 5                                   | 38           |
| Splice acceptor                   | 6,348               | 0                                   | 3            |
| Splice donor                      | 5,763               | 0                                   | 5            |
| Splice region                     | 99,728              | 2                                   | 59           |
| Stop gained                       | 12,325              | 1                                   | 4            |
| Stop lost                         | 1,019               | 0                                   | 0            |
| Stop retained                     | 444                 | 0                                   | 0            |
| Synonymous                        | 692,633             | 16                                  | 236          |
| Upstream gene variant             | 11,315              | 0                                   | 0            |
| <b>Total variants</b>             | <b>3,133,925</b>    | <b>61</b>                           | <b>824</b>   |

\*Variants with lower tranche scores were included. <sup>†</sup>Exon with flanking 10 bp and passing tranche scores.
