# Supplementary material for: Association of a novel dystrophin (DMD) genetic nonsense variant in a cat with X‐linked muscular dystrophy with a mild clinical course
Source: PubMed Central journal article supplement — J Vet Intern Med. 2024 Feb 28;38(2):1160–6. doi: 10.1111/jvim.17024 (PMC10937502; doi:10.1111/jvim.17024), 2024-02-28
Supplement: JVIM-38-1160-s005.pdf [file JVIM-38-1160-s005.pdf]

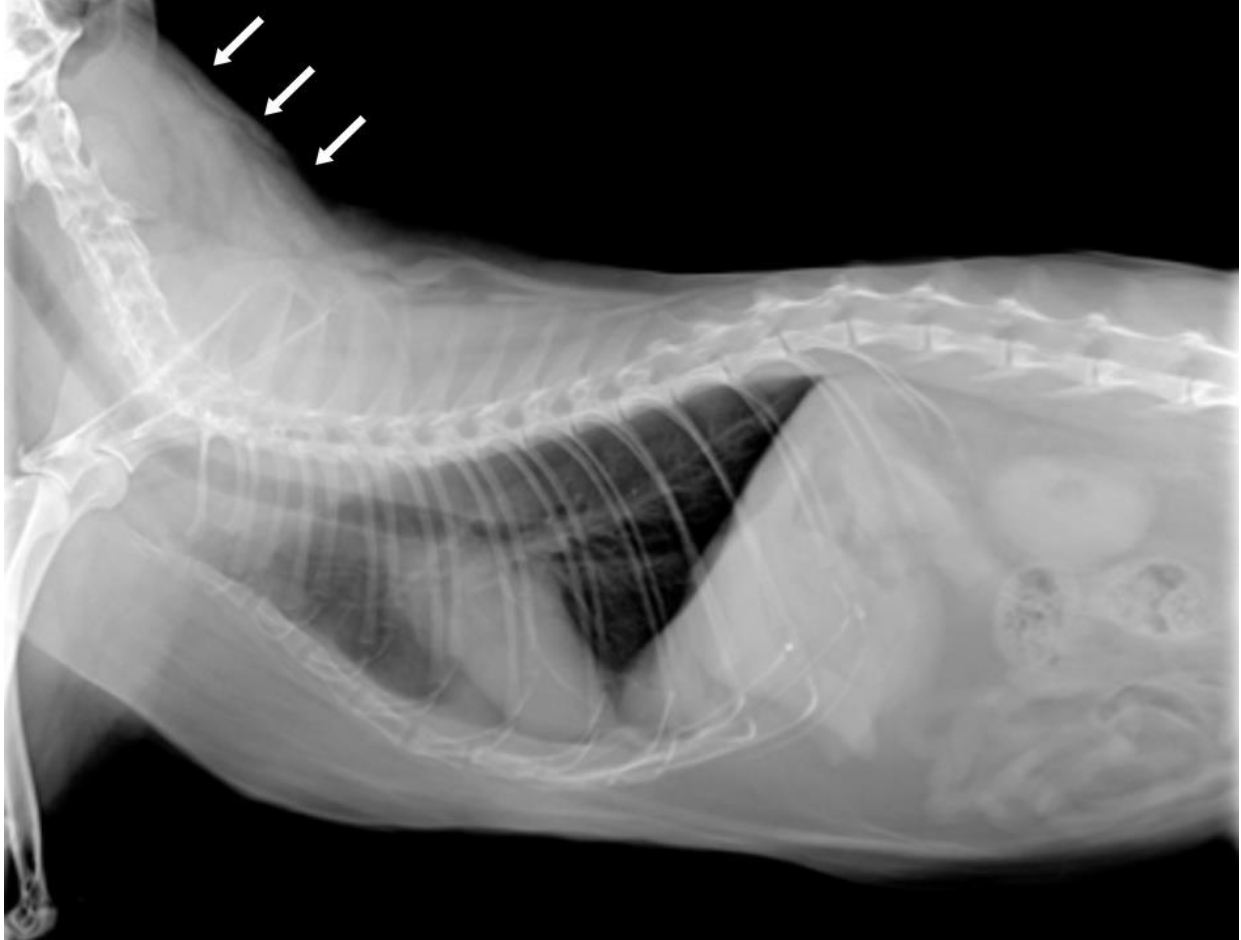

**Figure S1.** Inspiratory lateral (right-side) thoracic X-ray of the present case. No cardiac enlargement, diaphragmatic irregularity, or associated megaesophagus were observed. The cat presented with neck muscle hypertrophy (arrows).
